# Supplementary material
Source: PubMed Central journal article supplement (PMC6597338)
Supplement: NIHMS1517515-supplement-1.pdf [file NIHMS1517515-supplement-1.pdf]

# **Neurotrophic and Antidepressant Actions of Brain-Derived Neurotrophic Factor Require Vascular Endothelial Growth Factor**

## ***Supplemental Information***

### **Supplemental Methods**

#### **Forced swim test (FST)**

Mice were subjected to a 10-min swim (FST1) in a 4-L glass beaker containing water ( $24 \pm 1^\circ\text{C}$ , 15 cm depth). After 24 h, each mouse was again placed in the beaker for 10 min (FST2) and videotaped. The duration of immobility was scored between 2 and 6 min by an experimenter blinded to the treatment groups.

#### **Female urine sniffing test (FUST)**

Mice were habituated to a water-soaked cotton-tipped applicator placed into their home cage for 1 h. Then, each mouse was exposed to a fresh water-dipped cotton-tipped applicator for 5 min. After a 45-min interval, each mouse was exposed to a cotton-tipped applicator infused with fresh urine from females of the same strain for 5 min. The time spent sniffing the cotton-tipped applicator was measured by a blinded experimenter.

#### **Novelty-suppressed feeding (NSF) test**

Mice were food-deprived overnight and placed in an open field (50 cm  $\times$  50 cm  $\times$  40 cm) with a small amount of food in the center. The latency to feed was measured with a cut-off time

of 15 min in a blind manner. After the NSF, home cage feeding (HCF) during a 10-min period was measured to verify motivation to feed.

### **Locomotor activity (LMA) test**

Each mouse was placed in a testing cage (17.2 cm × 28.4 cm × 12 cm) for 20 min, and the total distance traveled was monitored using the ANY-maze video tracking system (Stoelting, Wood Dale, IL).

### **Primary cortical neuronal cultures**

Pregnant female rats were euthanized and cortices from E18 embryos were dissected. Following incubation in 0.25% trypsin-EDTA (Thermo Fisher Scientific, Waltham, MA) for 10 min, cortices were dissociated and neurons were plated at 0.6 million cells per well in 6-well poly-L-lysine-coated plates containing DMEM with 10% fetal bovine serum and 1% penicillin-streptomycin (Thermo Fisher Scientific). For dendritic morphology, cells were plated on glass coverslips (22 × 22 mm) at 0.3 million cells per well in 6-well poly-L-lysine-coated plates. The following day, medium was changed to a serum-free medium containing neurobasal, B27 supplement (Thermo Fisher Scientific), 0.5 mM L-glutamine, 1% penicillin-streptomycin and 1.1 mM sodium pyruvate which was changed every 5 days. Cells were maintained at 37°C, 5% CO<sub>2</sub>, and 95% humidity. For measurement of BDNF or VEGF, the cells were grown in the medium as described above for 10 days.

**Sholl analysis**

On DIV 3, neurons were incubated with AAV2 encoding *enhanced green fluorescent protein* (*Egfp*) for 72 h. On DIV 17, neurons were treated with either 0.1% DMSO, ZM323881 (10 nM), or ANA-12 (5  $\mu$ M). After 30 min, neurons were treated with either vehicle (0.0001% BSA/PBS), BDNF (50 ng/mL) or VEGF (50 ng/mL). After 24 h incubation, neurons were fixed with 10% buffered formalin. Coverslips were mounted onto slides and imaged for EGFP using a fluorescence microscope (Axioskop2, Zeiss) equipped with a CCD camera (AxioCam MRm; Zeiss). Brightness and contrast were adjusted using Photoshop CC 2019 (Adobe, San Jose, CA). The number of dendritic crossings at 50 and 100  $\mu$ m distances from the soma was measured by a blinded experimenter.

## Supplemental Figures

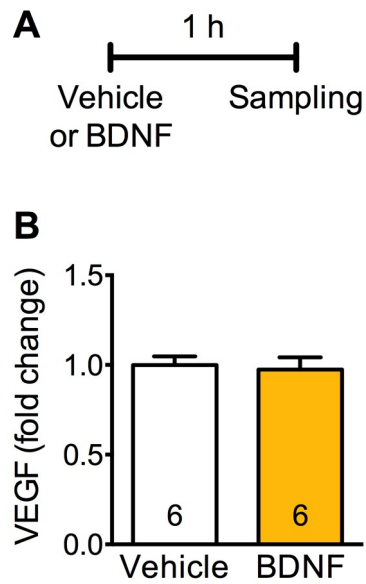

**Figure S1.** One-hour incubation of BDNF did not increase VEGF release in rat primary cultured cortical neurons. (A) Experimental timeline. (B) VEGF levels in media after 1-h incubation of vehicle (0.0001% BSA/PBS) or BDNF (50 ng/mL;  $t_{10} = 0.298$ ,  $p = .772$ ,  $n = 6$ , Student's *t*-test). Data are expressed as means  $\pm$  SEM.

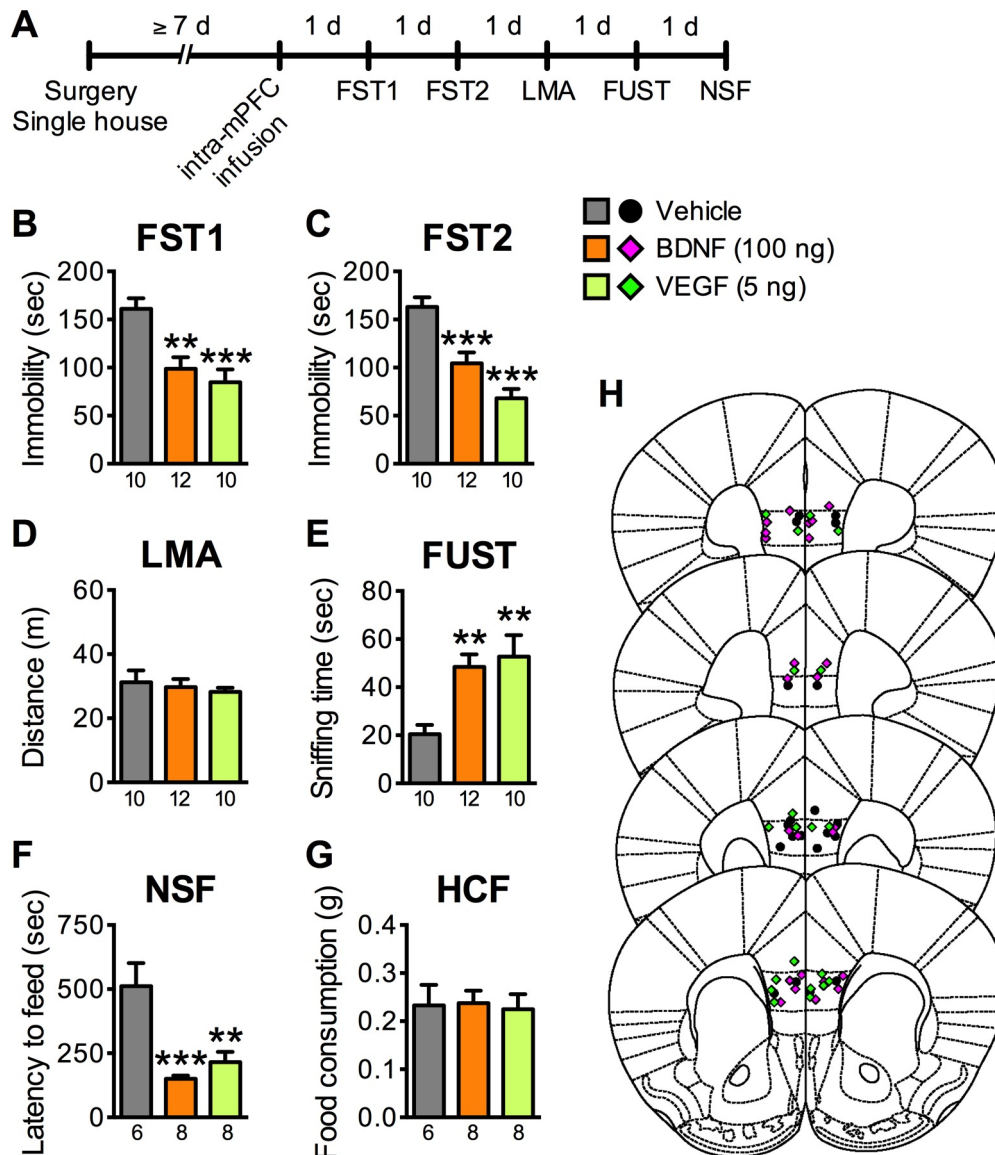

**Figure S2.** A single intra-mPFC infusion of BDNF or VEGF produces sustained antidepressant-like effects. (A) Experimental timeline for behavioral testing after intra-mPFC infusion of vehicle, BDNF (100 ng/side), or VEGF (5 ng/side). (B) Immobility time in the FST1 1 day after intra-mPFC infusion ( $F_{2,29} = 10.4$ ,  $p = .0004$ ,  $n = 10-12$ ). (C) Immobility time in the FST2 2 days after intra-mPFC infusion ( $F_{2,29} = 19.5$ ,  $p < .0001$ ,  $n = 10-12$ ). (D) LMA 3 days after intra-mPFC infusion ( $F_{2,29} = .305$ ,  $p = .740$ ,  $n = 10-12$ ). (E) Time spent sniffing female urine in the FUST 4 days after intra-mPFC infusion ( $F_{2,29} = 7.53$ ,  $p = .0023$ ,  $n = 10-12$ ). (F) Latency to feed in the NSF 5 days after intra-mPFC infusion ( $F_{2,19} = 13.6$ ,  $p = .0002$ ,  $n = 6-8$ ). (G) HCF just after the NSF ( $F_{2,19} = .0416$ ,  $p = .959$ ,  $n = 6-8$ ). (H) Schematic representation of mPFC infusion sites. Data are expressed as means  $\pm$  SEM. \*\* $p < .01$ , \*\*\* $p < .001$  relative to vehicle.

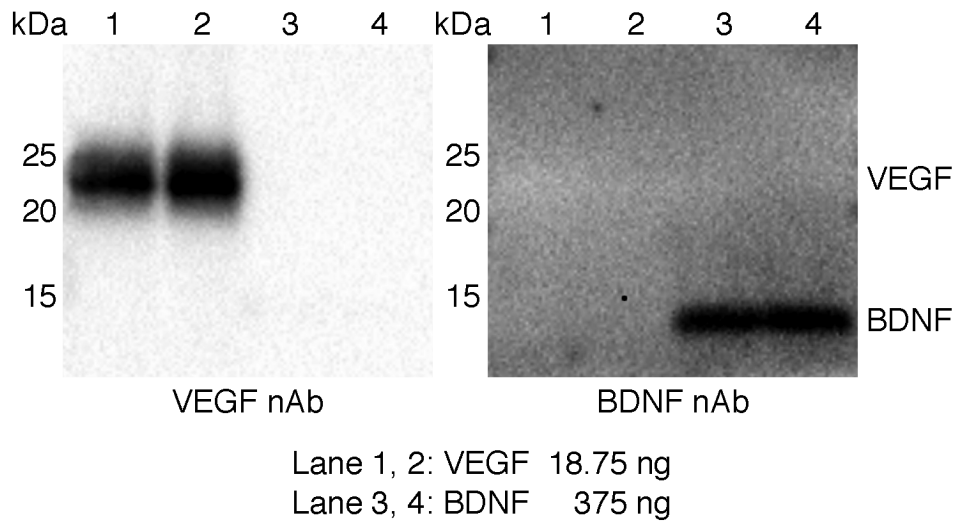

**Figure S3.** VEGF nAb and BDNF nAb used in the current study did not react with recombinant BDNF and VEGF, respectively.
